# Supplementary material for: Eco-friendly and sustainable basil seed hydrogel-loaded copper hydroxide-based catalyst for the synthesis of propargylamines and tetrazoles
Source: Royal Society of Chemistry journal article supplement (doi:10.1039/d3na01085f), 2024-01-01
Supplement: d3na01085f1.pdf [file d3na01085f1.pdf]

**Supporting information for:**

**Eco-Friendly and Sustainable Basil Seed Hydrogel-Loaded Copper Hydroxide-Based  
Catalyst for the Synthesis of Propargylamines and Tetrazoles**

Effat Samiee Paghaleh<sup>a</sup>, Eskandar Kolvari<sup>a,\*</sup>, Farzad Seidi<sup>d</sup>, Kheibar Dashtian<sup>c</sup>

<sup>a</sup> *Department of Chemistry, Semnan University, P.O. Box 35131-19111, Semnan, Iran*

<sup>b</sup> *Jiangsu Co-Innovation Center of Efficient Processing and Utilization of Forest Resources and  
International Innovation Center for Forest Chemicals and Materials, Nanjing Forestry  
University, Nanjing 210037, China*

<sup>c</sup> *Department of Chemistry, Iran University of Science and Technology, Tehran, 16846-13114,  
Iran*

\* *Corresponding author, E-mail addresses: kolvari@semnan.ac.ir (E. Kolvari)*

## S1. Spectral data of propargylamines derivatives

### 2-(1-morpholino-3-phenylprop-2-yn-1-yl)phenol:

IR (KBr,  $\text{cm}^{-1}$ ): 3388, 2956, 2925, 2854, 2497, 1718, 1637, 1600, 1485, 1452, 1396, 1276, 1174, 1114, 1070, 1010, 871, 848, 825, 757, 713, 690, 547, 437, 414.

### 4-(3-phenyl-1-(p-tolyl)prop-2-yn-1-yl)morpholine:

IR (KBr,  $\text{cm}^{-1}$ ): 2956, 2923, 2856, 1728, 1685, 1610, 1577, 1527, 1456, 1421, 1346, 1288, 1178, 1118, 1072, 945, 756, 719, 690, 609, 543, 470.

### 4-(1-(4-bromophenyl)-3-phenylprop-2-yn-1-yl)morpholine:

IR (KBr,  $\text{cm}^{-1}$ ): 3411, 3058, 2956, 2923, 2854, 1716, 1645, 1589, 1487, 1450, 1317, 1276, 1174, 1116, 1070, 1010, 848, 756, 711, 690, 549.  $^1\text{H}$ NMR (400 MHz,  $\text{CDCl}_3$ ):  $\delta$ H (ppm) 7.50-7.47 (m, 6H), 7.34-7.33 (m, 3H), 4.73 (s, 1H), 3.76-3.67 (m, 4H), 2.61-2.59 (m, 4H).  $^{13}\text{C}$ NMR (100 MHz,  $\text{CDCl}_3$ ):  $\delta$ C (ppm) 137.0, 131.8, 131.3, 130.2, 128.4, 128.3, 122.7, 121.7, 88.9, 84.2, 67.1, 61.4, 49.8.

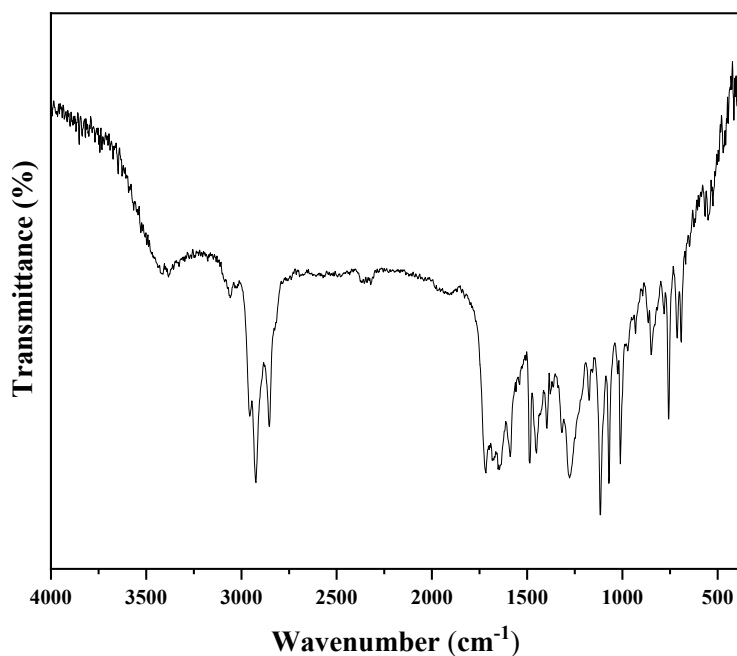

Fig. S1. spectrum of IR 4-(1-(4-bromophenyl)-3-phenylprop-2-yn-1-yl)morpholine

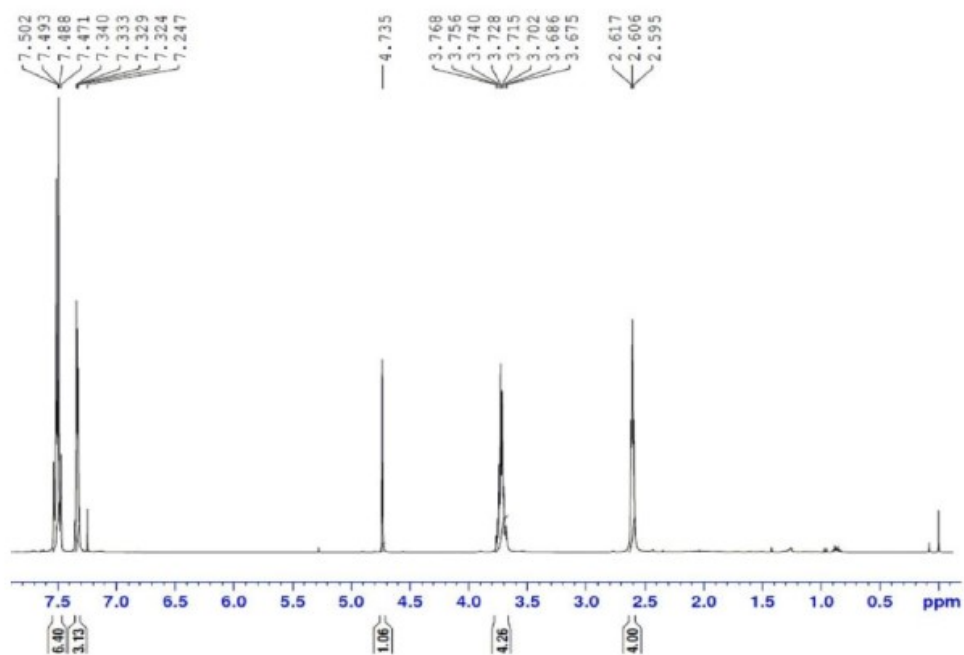

Fig. S2. spectrum of  $^1\text{H}$ NMR 4-(1-(4-bromophenyl)-3-phenylprop-2-yn-1-yl)morpholine

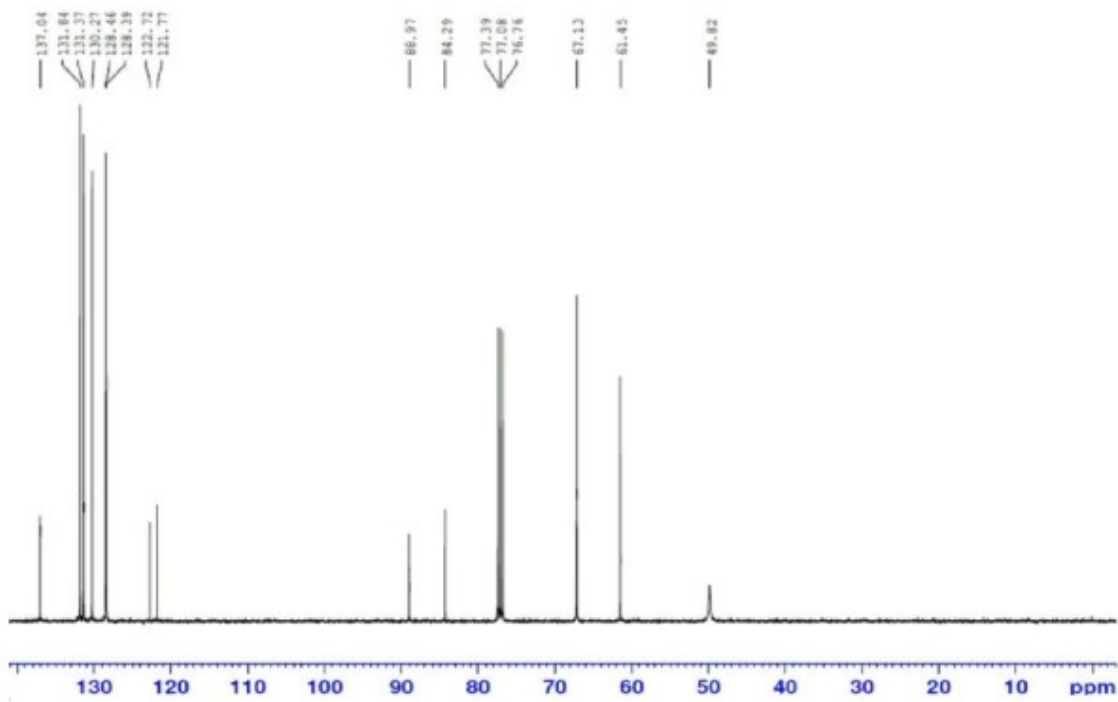

Fig. S3. spectrum of  $^{13}\text{C}$ -NMR 4-(1-(4-bromophenyl)-3-phenylprop-2-yn-1-yl)morpholine

## S2. Spectral data of tetrazoles derivatives

### **3-(3-nitrophenyl)-2-(1H-tetrazol-5-yl)acrylonitrile:**

IR (KBr,  $\text{cm}^{-1}$ ): 3346, 3338, 2198, 1656, 1533, 1350, 1103, 985, 811, 721.

### **3-(4-chlorophenyl)-2-(1H-tetrazol-5-yl)acrylonitrile:**

IR (KBr,  $\text{cm}^{-1}$ ): 3421, 3157, 3147, 2920, 2229, 1650, 1585, 1494, 1093, 1031, 829, 702, 507.

### **3-(4-bromophenyl)-2-(1H-tetrazol-5-yl)acrylonitrile:**

IR (KBr,  $\text{cm}^{-1}$ ): 3139, 3122, 2194, 1645, 1606, 1581, 1558, 1488, 1473, 1074, 1029, 1008, 825, 503.39

### **3-phenyl-2-(1h-tetrazole-5-yl) acrylonitrile:**

IR (KBr,  $\text{cm}^{-1}$ ): 3344, 3055, 3029, 3001, 2985, 2879, 2879, 2850, 2756, 2740, 2729, 2698, 2690, 2644, 2619, 2559, 2227, 2198, 1652, 1612, 1596, 1571, 1552, 1452, 1290, 1215, 1195, 1195, 1029, 941, 771, 763, 688, 607, 590.  $^1\text{H-NMR}$  ( $\text{DMSO-d}_6$ ),  $\delta$ ppm: 2.5(brs, NH, overlap with solvent), 7.59-7.62 (m, 3H, CH-Ar), 8.00-8.03 (m, 2H, CH-Ar), 8.39 (s, 1H, CH),  $^{13}\text{C-NMR}$  ( $\text{DMSO-d}_6$ ),  $\delta$ ppm: 97.01, 115.59, 129.40, 129.54, 129.93, 132.23, 132.43, 148.53.

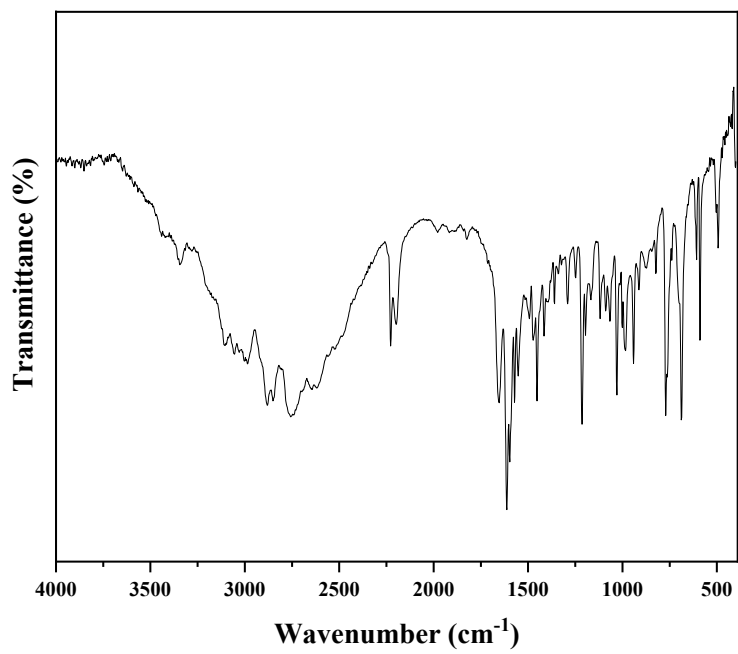

**Fig. S4.** spectrum of IR 3-phenyl-2-(1h-tetrazole-5-yl) acrylonitrile

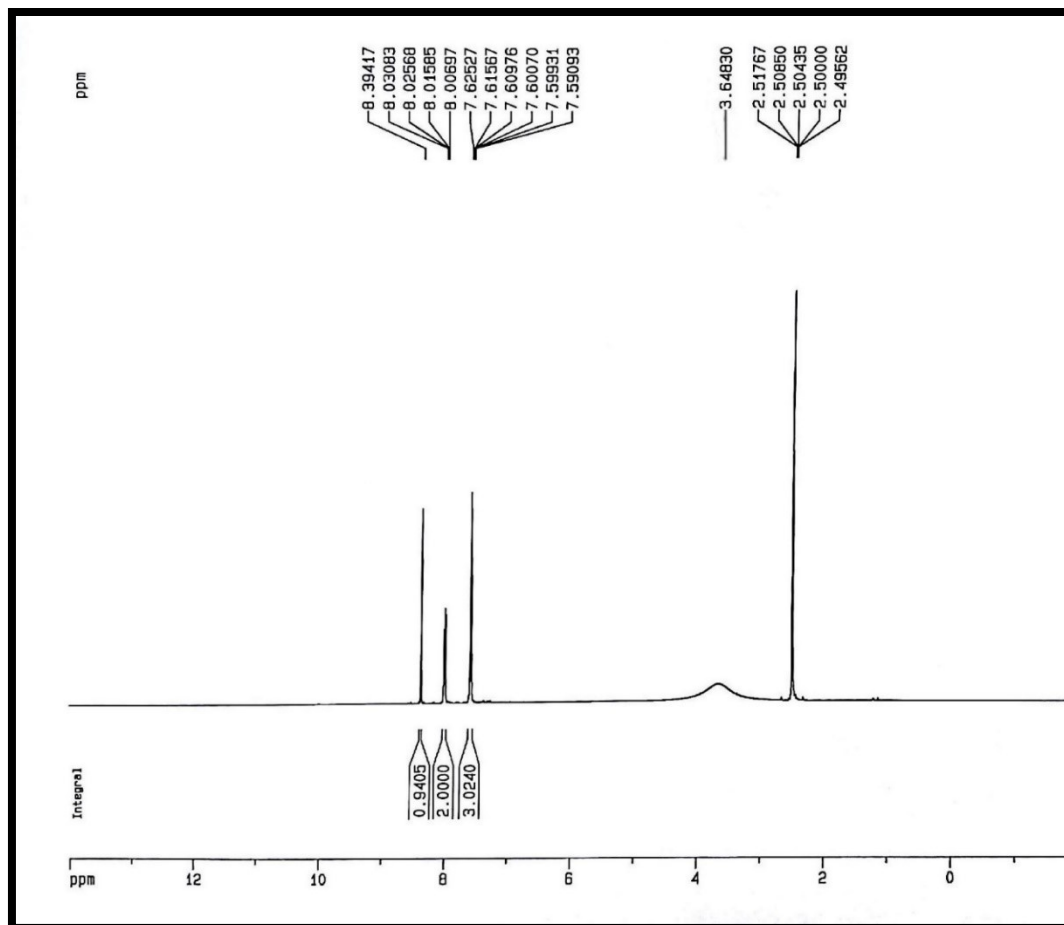

**Fig. S5.** spectrum of  $^1\text{H}$ NMR 3-phenyl-2-(1H-tetrazole-5-yl) acrylonitrile

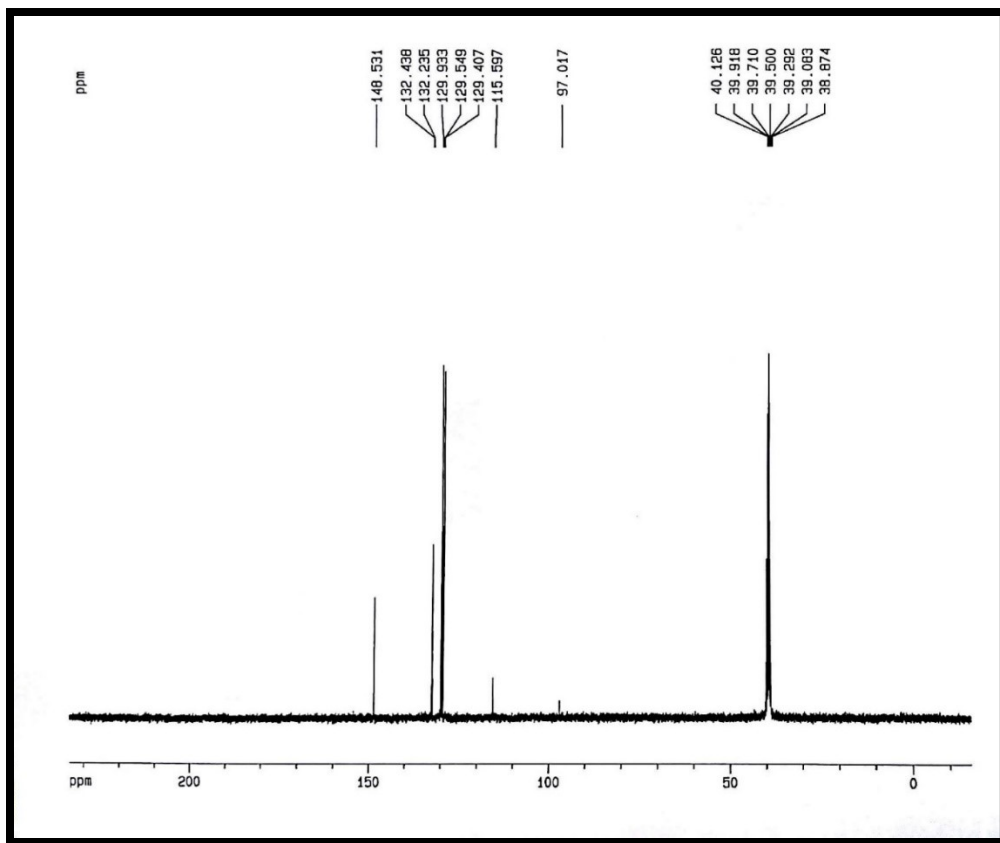

**Fig. S6.** spectrum of  $^{13}\text{C}$ -NMR 3-phenyl-2-(1h-tetrazole-5-yl) acrylonitrile

**2-(1H-tetrazol-5-yl)-3-(p-tolyl)acrylonitrile:**

$^1\text{H}$ NMR (DMSO- $d_6$ ),  $\delta$ ppm: 2.5(brs, NH, overlap with solvent), 2.39 (s, 3H, CH), 7.40-7.42(d, 2H, CH-Ar), 7.91-7.93(d, 2H, CH-Ar), 8.33(s, 1H, CH).  $^{13}\text{C}$ -NMR (DMSO- $d_6$ ),  $\delta$ ppm: 21.34, 95.48, 115.77, 129.53, 130.03, 130.06, 143.17, 148.54

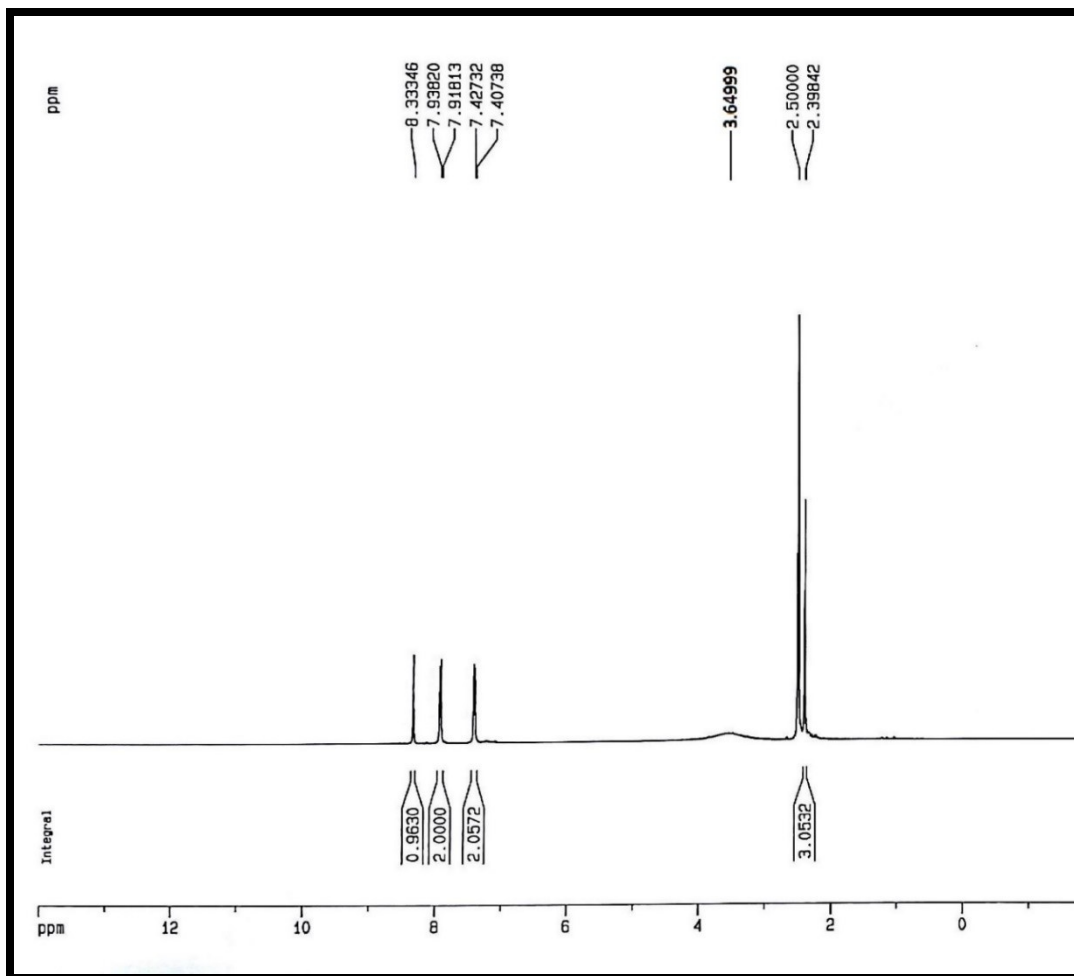

**Fig. S7.** spectrum of <sup>1</sup>H NMR 2-(1H-tetrazol-5-yl)-3-(p-tolyl)acrylonitrile



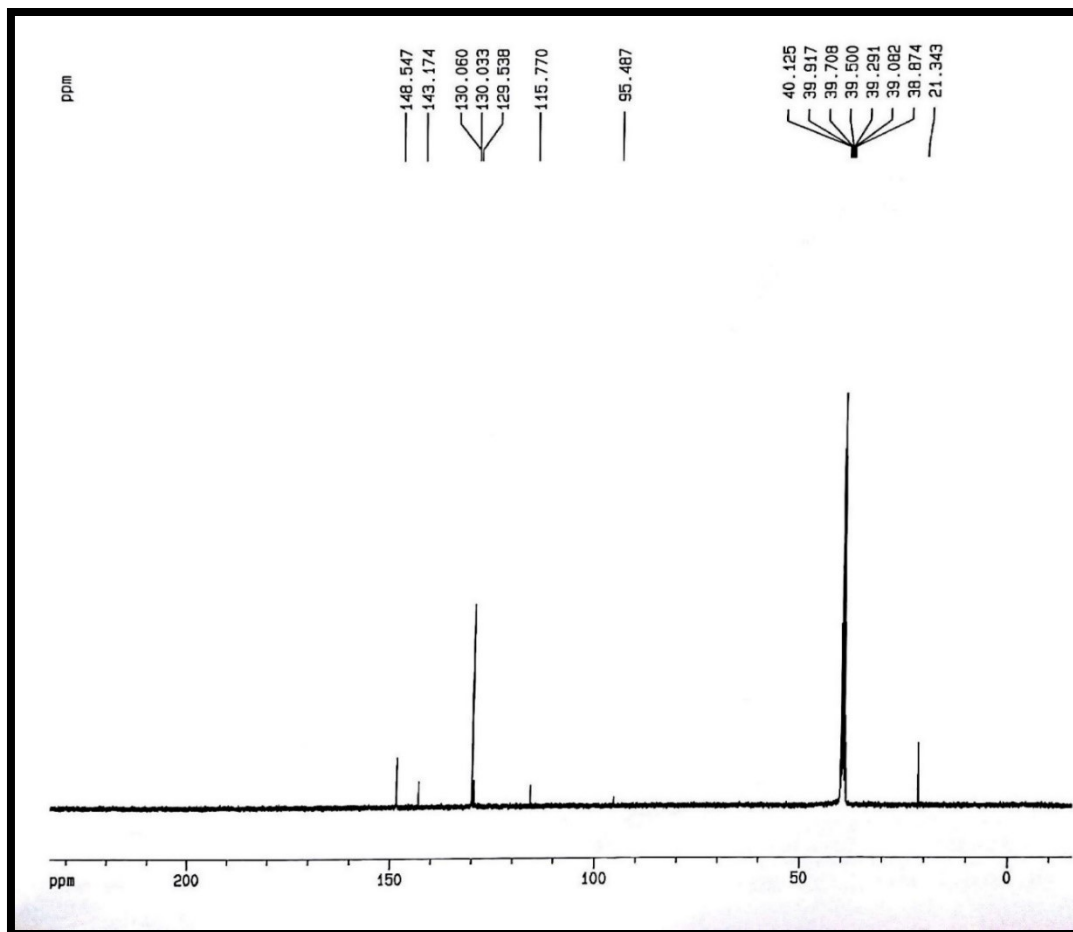

**Fig. S8.** spectrum of CNMR 2-(1H-tetrazol-5-yl)-3-(p-tolyl)acrylonitrile
